# Supplementary material for: Integrative proteomics to understand the transmission mechanism of Barley yellow dwarf virus-GPV by its insect vector Rhopalosiphum padi
Source: PubMed Central journal article supplement (PMC4498328; doi:10.1038/srep10971), 2015-07-10
Supplement: srep10971-s1.pdf [file srep10971-s1.pdf]

## Supporting Information for

Integrative proteomics to understand the transmission mechanism of *Barley yellow dwarf virus-GPV* by its insect vector *Rhopalosiphum padi*

Hui Wang<sup>1</sup>, Keke Wu<sup>1,2</sup>, Yan Liu<sup>1</sup>, Yunfeng Wu<sup>2</sup>, Xifeng Wang<sup>1\*</sup>

<sup>1</sup>*State Key Laboratory for Biology of Plant Diseases and Insect Pests, Institute of Plant Protection, Chinese Academy of Agricultural Sciences, Beijing, China*

<sup>2</sup>*College of Plant Protection, Northwest A & F University, Yangling 712100, China*

\*Corresponding author: Email: [xfwang@ippcaas.cn](mailto:xfwang@ippcaas.cn)

**Supplementary Table S1 | Primers used in this study**

| <b>Primer</b>                 | <b>Primer sequence</b>                          |
|-------------------------------|-------------------------------------------------|
| <b>RT-qPCR</b>                |                                                 |
| Myosin-F                      | GGTCGTAATAAGGACCAAGTTGC                         |
| Myosin-R                      | CCTCACGTTGGTACTCTTCTTG                          |
| Paramyosin-F                  | CAGATGAACGTTACCAACGG                            |
| Paramyosin-R                  | GCGTTGGCTTCGACTTCTTC                            |
| Vinculin-F                    | GCTCTAAATCAAGCTGCCACAC                          |
| Vinculin-R                    | CATCTGGTCCTCAGATAATCG                           |
| Actin-F                       | AACGGAAGCACCTTTGAACC                            |
| Actin-R                       | GGAAGAAGCAGCAGTAGCCAT                           |
| <b>Yeast two-hybrid assay</b> |                                                 |
| CP-pDHB1F                     | ATTAACAAGGCCATTACGGCCATGAGTACGGTCGCCCTTAG       |
| CP-pDHB1R                     | AACTGATTGGCCGAGGCGGCCCCCTATTTTCGGGTTTTGAAACAGG  |
| RTP-pDHB1F                    | ATTAACAAGGCCATTACGGCCGTAGACGCGGAACCCGGTCCTAG    |
| RTP-pDHB1R                    | AACTGATTGGCCGAGGCGGCCCCCTTAGGAACGGCCACCACCAAATG |
| <b>Co-IP assay</b>            |                                                 |
| CP-pAcGFPF                    | TCTGTTCGACGAGGAGCAGAAGCTGATCTCAGAGG             |
| CP-pAcGFPR                    | CGCAAGCTTTTTATTTTCGGGTTTTGAAACAGGAC             |
| RTP-pAcGFPF                   | TCTGTTCGACGAGGAGCAGAAGCTGATCTCAGAGG             |
| RTP-pAcGFPR                   | CGCAAGCTTTTTAGGAACGGCCACCACCAAATG               |
| Pan-pProLabelF                | TCTGTTCGACCCATACCCATACGATGTTCCAGAT              |
| Pan-pProLabelR                | TTATCTAGATTATCTAATGTCTTCTTTGGATA                |
| Tsr-pProLabelF                | GCAGTCGACATGGCATCGGGAGTAACCGTAG                 |
| Tsr-pProLabelR                | GGTGGATCC CTGTCTGTCTGGTGGACCTGAG                |
| P450-pProLabelF               | GACGGTACCACACTCTTCAATGTCAACAGCCGTG              |
| P450-pProLabelR               | GGTGGATCCAGCAGCGGTCTTAGCTAGTGAC                 |
| Tpm-pProLabelF                | GACGGTACCAAGAAGGGTTTCATGACCCCGGAC               |
| Tpm-pProLabelR                | TTA TCTAGA AGCTGTTGCTGCTGGTCCCGGTACG            |
| CV4-pProLabelF                | GCAGTCGACGTACAGGGTGTGATGCAAGTGC                 |
| CV4-pProLabelR                | GGTGGATCCACTTTTCCATGTGTTCTTTTCGTAATC            |
| Naca-pProLabelF               | GCAGTCGACATGCCTGAATTAACGGAAATC                  |
| Naca-pProLabelR               | GGTGGATCCCATTTGTCAAGTCCATAATAGC                 |
| Comx-pProLabelF               | GCAGTCGACATGGCGGCTTTTGTGGCAAAGC                 |
| Comx-pProLabelR               | GGTGGATCCTTGAAGACTGCACTTGCTCTC                  |

**Supplementary Figure S1 | Expression verification of the bait fusion vector.**

Expression of BYDV-GPV RTP bait and the CP bait were tested using the DUAL hunter functional assay. BYDV-GPV CP or RTD bait fusion vector was used to cotransformed with the control plasmid pOst1-NubI or pPR3-N empty insert and grown on selective SD medium (DDO/TDO/QDO). Co-expression of the pDHB1-CP (A)/RTP (B) with Ost1-NubI resulted in reporter gene activation as shown by growth of the yeast transformants on QDO, while co-expression of pDHB1-CP (A)/RTD (B) with pPR3-N empty insert did not yield any yeast transformant growth on QDO. pDHB1-LargeT and pDSL-p53 were used as positive controls; pDHB1-LargeT and pPR3-N-empty insert were used as negative controls.

**A**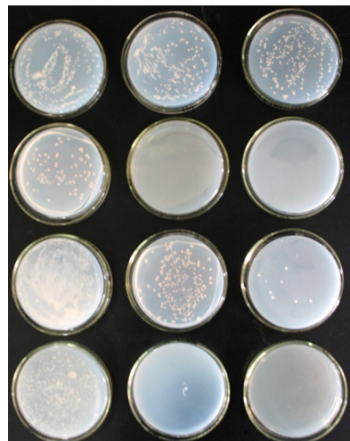

**pDHB1-CP  
+pOst1-NubI**

**pDHB1-CP +pPR3-N**

**pDHB1-largeT+pDSL-p53  
( positive control )**

**pDHB1-largeT+pPR3-N  
( negative control )**

**B**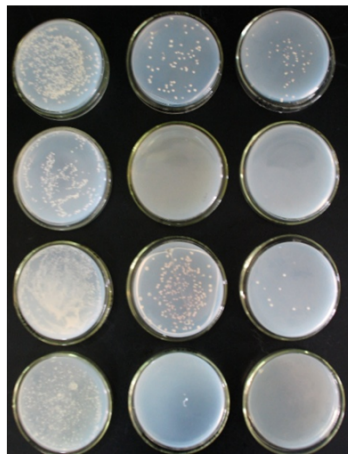

**pDHB1-RTP  
+pOst1-NubI**

**pDHB1-RTP+pPR3-N**

**pDHB1-largeT+pDSL-p53  
( positive control )**

**pDHB1-largeT+pPR3-N  
( negative control )**
